# Supplementary material for: Genome-Wide Identification and Analysis of TCP Transcription Factors Involved in the Formation of Leafy Head in Chinese Cabbage
Source: PubMed Central journal article supplement (PMC5877708; doi:10.3390/ijms19030847), 2018-03-14
Supplement: ijms-19-00847-s001.pdf [file ijms-19-00847-s001.pdf]

**Supplementary Table1 Comparison of TCP Homologue Gene between *Brassica rapa* and *Arabidopsis thaliana*.**

| Gene Name      | Homologue Gene in Ar. | Identity (%) | Gene Name       | Homologue Gene in Ar. | Identity (%) |
|----------------|-----------------------|--------------|-----------------|-----------------------|--------------|
| <i>BrTCP1a</i> |                       | 71           | <i>BrTCP13a</i> | <i>AtTCP13</i>        | 75           |
| <i>BrTCP1b</i> | <i>AtTCP1</i>         | 70           | <i>BrTCP13b</i> |                       | 75           |
| <i>BrTCP1c</i> |                       | 70           | <i>BrTCP14</i>  | <i>AtTCP14</i>        | 76           |
| <i>BrTCP2a</i> |                       | 80           | <i>BrTCP15a</i> |                       | 84           |
| <i>BrTCP2b</i> | <i>AtTCP2</i>         | 79           | <i>BrTCP15b</i> | <i>AtTCP15</i>        | 86           |
| <i>BrTCP3</i>  | <i>AtTCP3</i>         | 60           | <i>BrTCP15c</i> |                       | 80           |
| <i>BrTCP4a</i> |                       | 76           | <i>BrTCP17</i>  | <i>AtTCP17</i>        | 67           |
| <i>BrTCP4b</i> | <i>AtTCP4</i>         | 69           | <i>BrTCP18a</i> |                       | 70           |
| <i>BrTCP4c</i> |                       | 66           | <i>BrTCP18b</i> | <i>AtTCP18</i>        | 68           |
| <i>BrTCP5a</i> |                       | 82           | <i>BrTCP19</i>  | <i>AtTCP19</i>        | 68           |
| <i>BrTCP5b</i> | <i>AtTCP5</i>         | 73           | <i>BrTCP20a</i> |                       | 79           |
| <i>BrTCP6</i>  | <i>AtTCP6</i>         | 59           | <i>BrTCP20b</i> | <i>AtTCP20</i>        | 65           |
| <i>BrTCP7a</i> |                       | 70           | <i>BrTCP21a</i> |                       | 80           |
| <i>BrTCP7b</i> | <i>AtTCP7</i>         | 70           | <i>BrTCP21b</i> | <i>AtTCP21</i>        | 83           |
| <i>BrTCP7c</i> |                       | 70           | <i>BrTCP21c</i> |                       | 80           |
| <i>BrTCP8</i>  | <i>AtTCP8</i>         | 75           | <i>BrTCP22a</i> |                       | 78           |
| <i>BrTCP9a</i> |                       | 69           | <i>BrTCP22b</i> | <i>AtTCP22</i>        | 72           |
| <i>BrTCP9b</i> | <i>AtTCP9</i>         | 67           | <i>BrTCP24a</i> |                       | 73           |
| <i>BrTCP10</i> | <i>AtTCP10</i>        | 77           | <i>BrTCP24b</i> | <i>AtTCP24</i>        | 67           |
| <i>BrTCP12</i> | <i>AtTCP12</i>        | 67           |                 |                       |              |

Ar. equals to *Arabidopsis thaliana*.

**Supplementary Table 2 The locations of *AtTCPs* and *BrTCPs* on the Chromosome.**

|                             | Chr.1 | Chr.2 | Chr.3 | Chr.4 | Chr.5 | Chr.6 | Chr.7 | Chr.8 | Chr.9 | Chr.10 | Total |
|-----------------------------|-------|-------|-------|-------|-------|-------|-------|-------|-------|--------|-------|
| <i>Arabidopsis thaliana</i> | 8     | 3     | 6     | 1     | 6     | -     | -     | -     | -     | -      | 24    |
| <i>Brassica rapa</i>        | 3     | 8     | 8     | 1     | 4     | 3     | 5     | 2     | 4     | 1      | 39    |

**Supplementary Table 3 Primers of qPCR.**

| Primer Name      | Sequence (5'-3')         | Primer Name      | Sequence (5'-3')            |
|------------------|--------------------------|------------------|-----------------------------|
| <i>BrTCP1aF</i>  | GGCATAGCAAGATTCAGACGG    | <i>BrTCP1aR</i>  | CGAAGAACTGGCGAGCAATT        |
| <i>BrTCP1bF</i>  | GCAAGATTCACACGGCACAA     | <i>BrTCP1bR</i>  | GAGATCGAAGAATTGGCGAGAA      |
| <i>BrTCP1cF</i>  | TTTACCTTTCTTCGCTGCCG     | <i>BrTCP1cR</i>  | TTTGACCCGGAGATGCTGTT        |
| <i>BrTCP2aF</i>  | GTGCTCACCTTTCTCCGAC      | <i>BrTCP2aR</i>  | ATCCTGCCGGAGAAATCAGA        |
| <i>BrTCP2bF</i>  | TCCGATGAACGATGACGACA     | <i>BrTCP2bR</i>  | GACAACGAGTTAGCCGACG         |
| <i>BrTCP3F</i>   | GCGAGATCGTGGAGGTTGAA     | <i>BrTCP3R</i>   | TGGCCGTACAGACTTTGCTG        |
| <i>BrTCP4aF</i>  | GTTCTACGGCAGAGCAATCC     | <i>BrTCP4aR</i>  | GCCACCAGCCTCTGAATTGA        |
| <i>BrTCP4bF</i>  | TTCTTCTCAATGAGACGCCG     | <i>BrTCP4bR</i>  | TGACCTCCTTGACCTCGAC         |
| <i>BrTCP4cF</i>  | GACTGGTGGCTTGTAACGGC     | <i>BrTCP4cR</i>  | TCGTCGGAGAAGGAGCAAAG        |
| <i>BrTCP5aF</i>  | TCATCGAGGCAATGGACCTC     | <i>BrTCP5aR</i>  | GTGTCTGTCTTTGCCACCGA        |
| <i>BrTCP5bF</i>  | TCCAGGTACCAATTTAGGTTTCTT | <i>BrTCP5bR</i>  | CAAACTCTCTCGCGGTGTTG        |
| <i>BrTCP6F</i>   | GTTGCCTCTCTGTGTGCTG      | <i>BrTCP6R</i>   | CACTGGAGAGTCTCGCCGTC        |
| <i>BrTCP7aF</i>  | CGTCAAGCTGAGCCTTCCAT     | <i>BrTCP7aR</i>  | AGTGCATGTTGAGGTGGTGG        |
| <i>BrTCP7bF</i>  | ACGGAAGAGGGAGGAGGATC     | <i>BrTCP7bR</i>  | ATTTGTGGCCGAGCTCTCTC        |
| <i>BrTCP7cF</i>  | GAGCCTTCAATCATAGCCGC     | <i>BrTCP7cR</i>  | GTTTCTCGGAGTGAGGCTG         |
| <i>BrTCP8F</i>   | GGTTCCTTCTTGGCTCAGCC     | <i>BrTCP8R</i>   | GGCAAGCACCCCAAGATTAG        |
| <i>BrTCP9aF</i>  | CGGCCATCGCTATGTCTGTT     | <i>BrTCP9aR</i>  | CCGAGTTATCTCCCACGTCAG       |
| <i>BrTCP9bF</i>  | CTCCACCGTCGTCGTCATAA     | <i>BrTCP9bR</i>  | TTCCTCTTCTTCGACCTTGG        |
| <i>BrTCP10F</i>  | GTTATAGCGCCGGAGATGGA     | <i>BrTCP10R</i>  | GGTCTTTTCGTCCTGTGGCTC       |
| <i>BrTCP12F</i>  | CAACAACAGGAATGGTGATACCA  | <i>BrTCP12R</i>  | TTGAAATAGGGTTTCTCTCCTCATCTA |
| <i>BrTCP13aF</i> | TCGTGCTCGTGATGAAATC      | <i>BrTCP13aR</i> | TTTGCTGTGACGGTCTTTGC        |
| <i>BrTCP13bF</i> | GGAGACGGCGGACCTCTT       | <i>BrTCP13bR</i> | AGGAGAAGCCATGTAGAGAAGTAACA  |
| <i>BrTCP14F</i>  | TCTCCCTCCACCAACACCA      | <i>BrTCP14R</i>  | GCAAGTCTTCTGCGGTTGTG        |
| <i>BrTCP15aF</i> | ACGGTGAAACCATCGAGTGG     | <i>BrTCP15aR</i> | TAGCCGGAATGGTTCCAGTC        |
| <i>BrTCP15bF</i> | ATAAATCCGACGGCGAGACC     | <i>BrTCP15bR</i> | TGGTTCCAGTCCCTGTAGCG        |
| <i>BrTCP15cF</i> | TGGAACCATTCGGGCTAACT     | <i>BrTCP15cR</i> | CGAAGATGAGCAGCGGAGAG        |
| <i>BrTCP17F</i>  | GAATCGTGAGAGCCTCGAGAA    | <i>BrTCP17R</i>  | TCCTGTCTCGAAGACCACGAA       |
| <i>BrTCP18aF</i> | GCTGCGAGGAGTCTCAAACC     | <i>BrTCP18aR</i> | CTCTATCCTCGACTGTCCCAT       |
| <i>BrTCP18bF</i> | GCATGACCGAAAATAAGGTGG    | <i>BrTCP18bR</i> | TCTCCTTCAAAATGGGCGTT        |
| <i>BrTCP19F</i>  | GAAGGCACGACTCAAACGCT     | <i>BrTCP19R</i>  | CCCTGAGCCACCCAAAACCT        |
| <i>BrTCP20aF</i> | TTTTGCGTCCATTCTTGGTG     | <i>BrTCP20aR</i> | CCAACATTCCTTCCTGAGC         |
| <i>BrTCP20bF</i> | GTAAGAAGCAGCTTGCCCCC     | <i>BrTCP20bR</i> | TCCTGATTCTCCGACCGC          |
| <i>BrTCP21aF</i> | ACGAGCAACGACGGATCAGT     | <i>BrTCP21aR</i> | CACGGCGTTAAGAGTTCCTTTG      |
| <i>BrTCP21bF</i> | AAGGACCTCTTAACGCCGTCA    | <i>BrTCP21bR</i> | TGCGAATTCTCCTCCCTCTC        |
| <i>BrTCP21cF</i> | CTAACGGCGCCATAGTCGAG     | <i>BrTCP21cR</i> | GGTCCTTAGCCGGTGGTTTC        |
| <i>BrTCP22aF</i> | AGAACTCTACGACCGTCCG      | <i>BrTCP22aR</i> | GAACCGATCTTCCCGGTGAT        |
| <i>BrTCP22bF</i> | GGGAACTATTCGGCGAACT      | <i>BrTCP22bR</i> | TGAGCAAAGACGGTTGAGCC        |

---

*BrTCP24aF* CAAGACCGTCTTGGCTTCGA

*BrTCP24aR* CAACTCGGAGATGGAGTCGG

*BrTCP24bF* GCGGCTTCTGACTCAATCTCC

*BrTCP24bR* CGTGCTCGACTTAGACAGCG

*BrActin3F* GTACAACCGGCATCGTGCTT

*BrActin3R* CATGTGGAAGTGCATAACCCTC

---

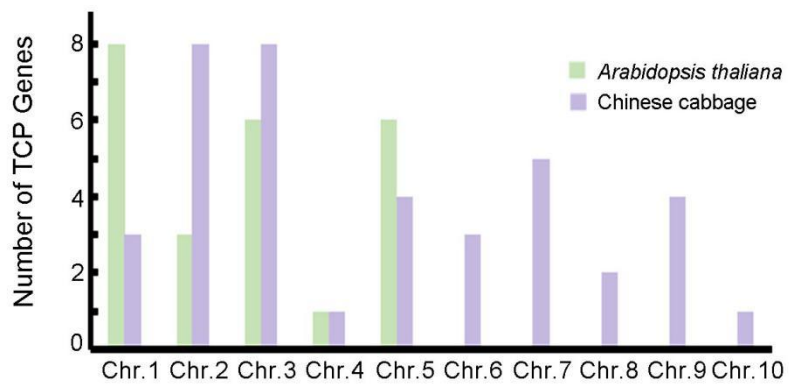

Supplementary Figure 1 The TCP number of *Arabidopsis thaliana* and *Brassica rapa* on each chromosome

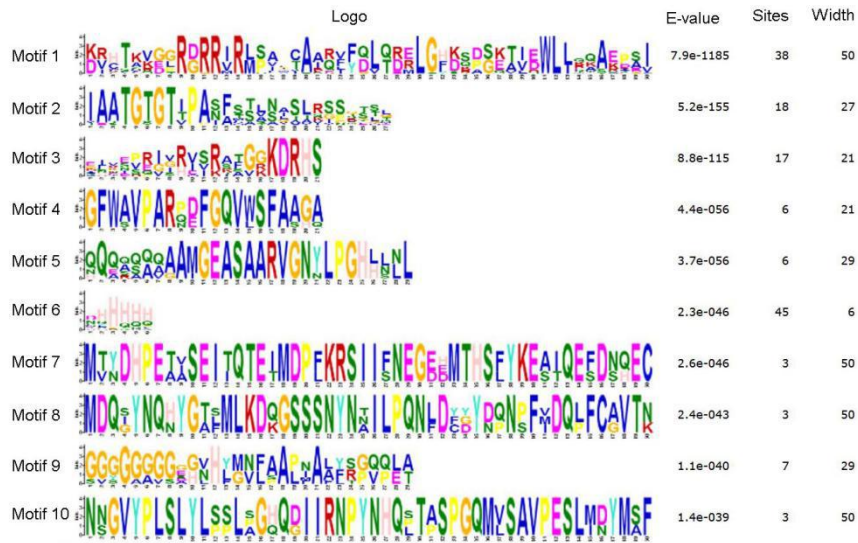

**Supplementary Figure2 Sequence logs of motifs in *BrTCPs***

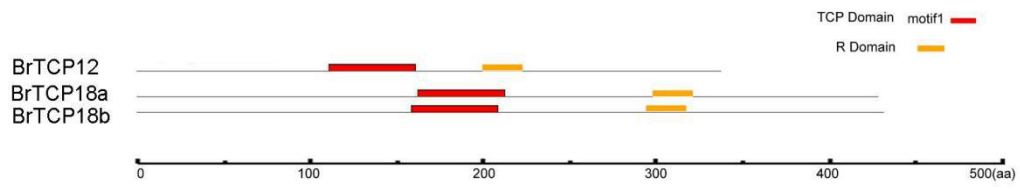

**Supplementary Figure 3** The location of R Domain on *BrTCP12*, *BrTCP18a* and *BrTCP18a*
